# Supplementary material
Source: ML conference proceedings conference paper supplement (https://openreview.net/forum?id=Mshexk31gE)
Supplement: supplementary_material [file attachment]

## Supplementary Material: Information Bottleneck-based Feature Weighting for Enhanced Medical Image Out-of-Distribution Detection

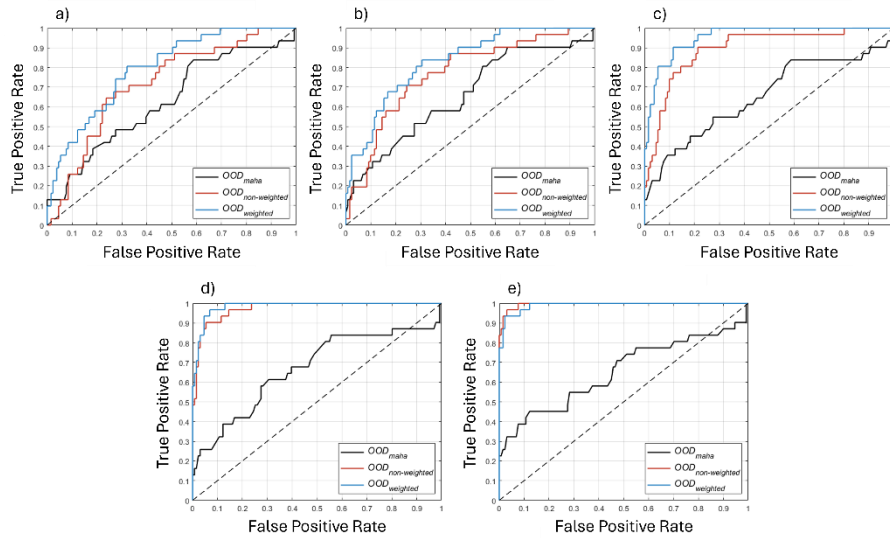

**Fig. 1.** Receiver operating characteristic curves for perturbed test image detection for each OOD distance measure. Curves are shown for detecting perturbations with magnitudes (a)  $\epsilon = 0.00$ , (b)  $\epsilon = 0.25$ , (c)  $\epsilon = 0.50$ , (d)  $\epsilon = 0.75$ , and (e)  $\epsilon = 1.00$ .

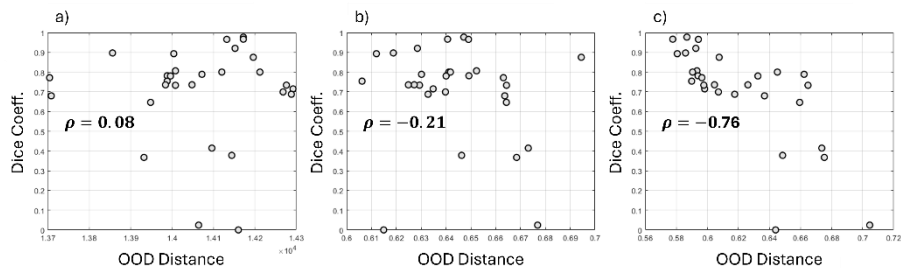

**Fig. 2.** Test data scatter correlation plots and Spearman's correlation coefficients ( $\rho$ ) between liver tumor segmentation Dice coefficient and OOD distance measure for (a) the Mahalanobis distance measure ( $OOD_{maha}$ ), (b) the non-weighted distance measure ( $OOD_{non-weighted}$ ), and (c) the weighted distance measure ( $OOD_{weighted}$ ). The  $OOD_{weighted}$  measure is shown after full information bottleneck optimization.
